# Supplementary material
Source: publisher figshare collection journal article supplement (https://karger.figshare.com/ndownloader/files/8955781)
Supplement: Supplementary file 1 [file 8955781]

## Erratum

---

The authors of the article 'Hypoxia Affected SDF-1 $\alpha$ -CXCR4 Interaction between Bone Marrow Stem Cells and Osteoblasts via Osteoclast Modulation' by Cho et al., published in *Acta Haematol* 2010;123:43–47, wish to include the following section:

### Acknowledgement

This study was supported by a grant from the Korea Science and Engineering Foundation (KOSEF), a grant funded by the Korean government (MOST) (R01-2006-000-10059-0).
